# Supplementary material for: Isolation of HLA-G+ cells using MEM-G/9 antibody-conjugated magnetic nanoparticles for prenatal screening: a reliable, fast and efficient method
Source: Royal Society of Chemistry journal article supplement (doi:10.1039/d1ra05988b), 2021-01-01
Supplement: d1ra05988b1.pdf [file d1ra05988b1.pdf]

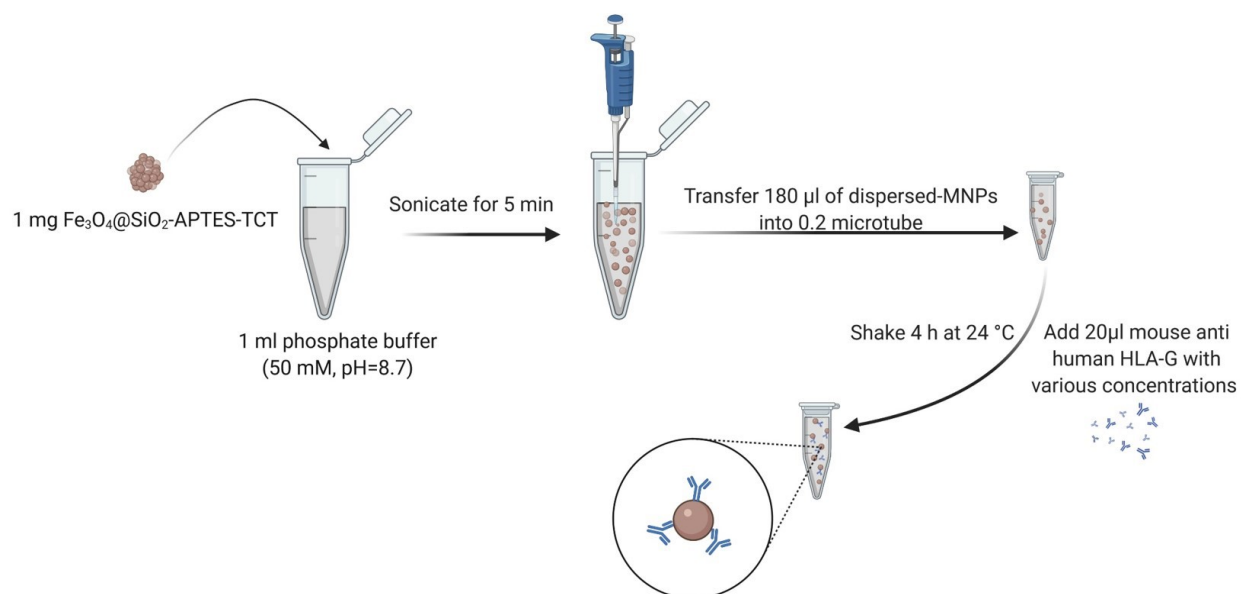

**Supplementary Fig. 1** A schematic of the steps of direct immobilization of HLA-G antibody on Fe<sub>3</sub>O<sub>4</sub>@SiO<sub>2</sub>-APTES-TCT nanoparticles. This figure was created using BioRender (<https://biorender.com/>).

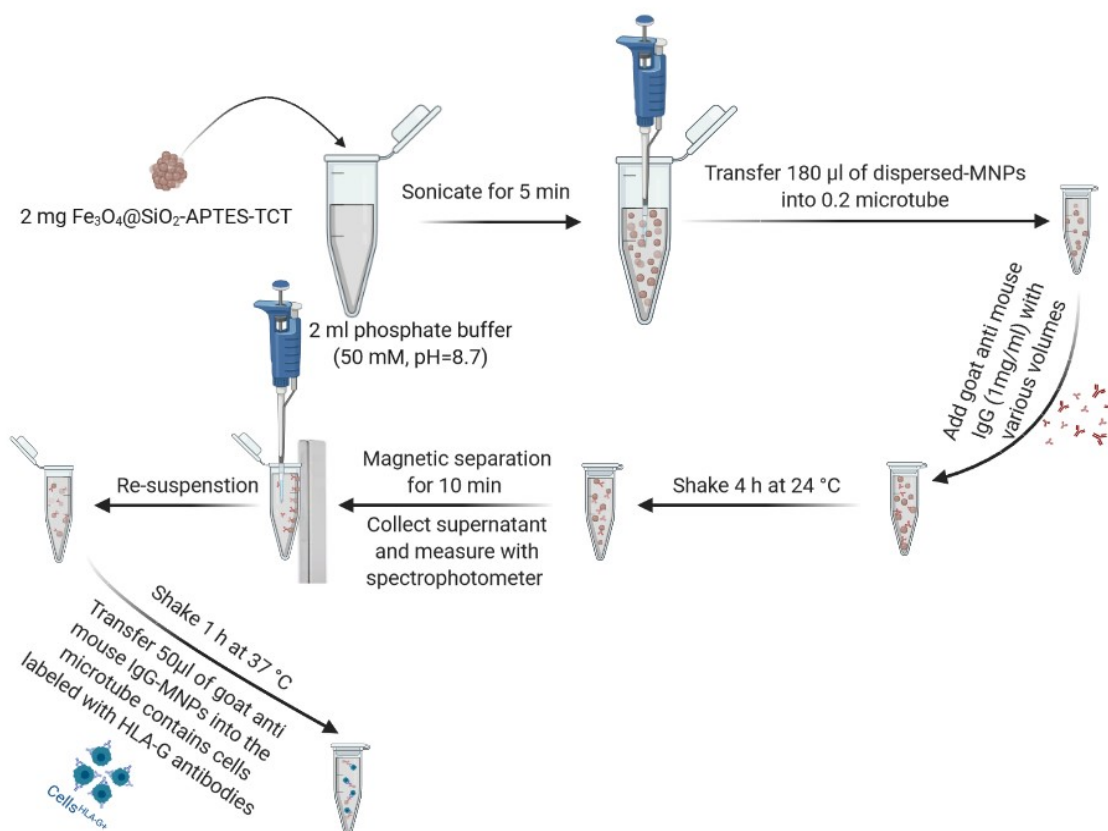

**Supplementary Fig. 2** A schematic of the steps of indirect immobilization of HLA-G antibody on Fe<sub>3</sub>O<sub>4</sub>@SiO<sub>2</sub>-APTES-TCT nanoparticles. This figure was created using BioRender (<https://biorender.com/>).

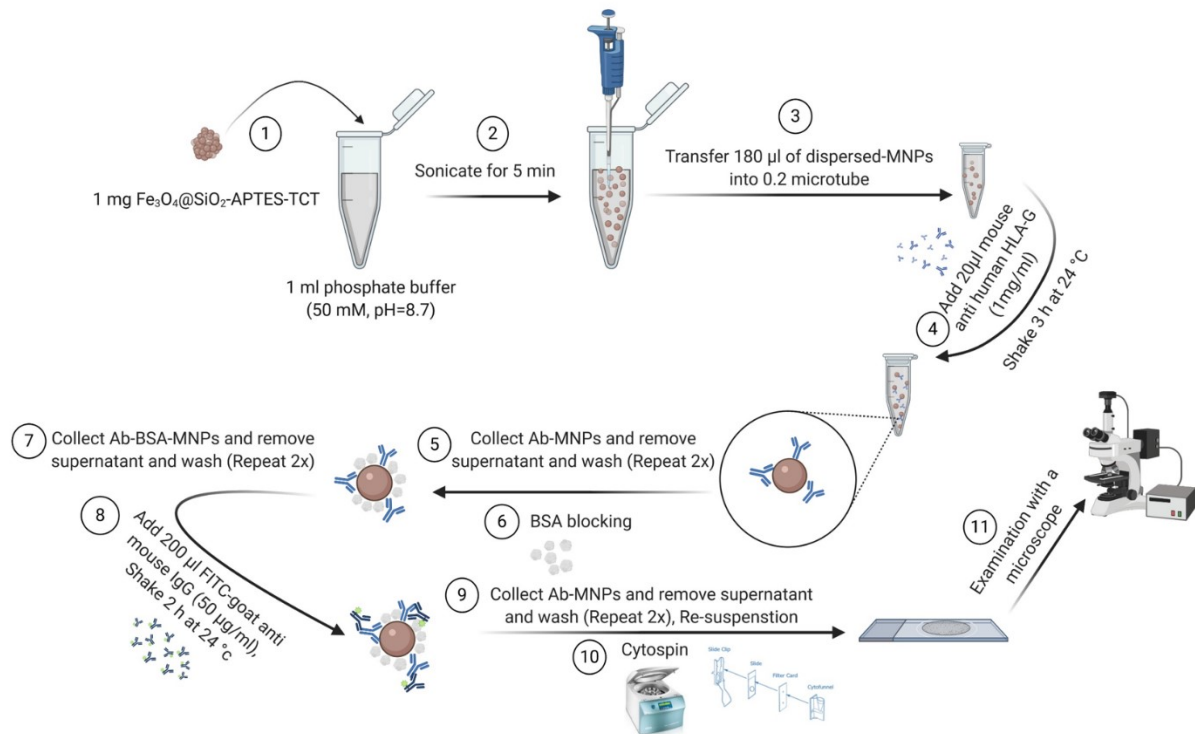

**Supplementary Fig. 3** Schematic diagram of immobilization confirmation of HLA-G antibody (Ab) on magnetic nanoparticles (MNPs) with FITC-IgG immune reactivity. This figure was created using BioRender (<https://biorender.com/>).

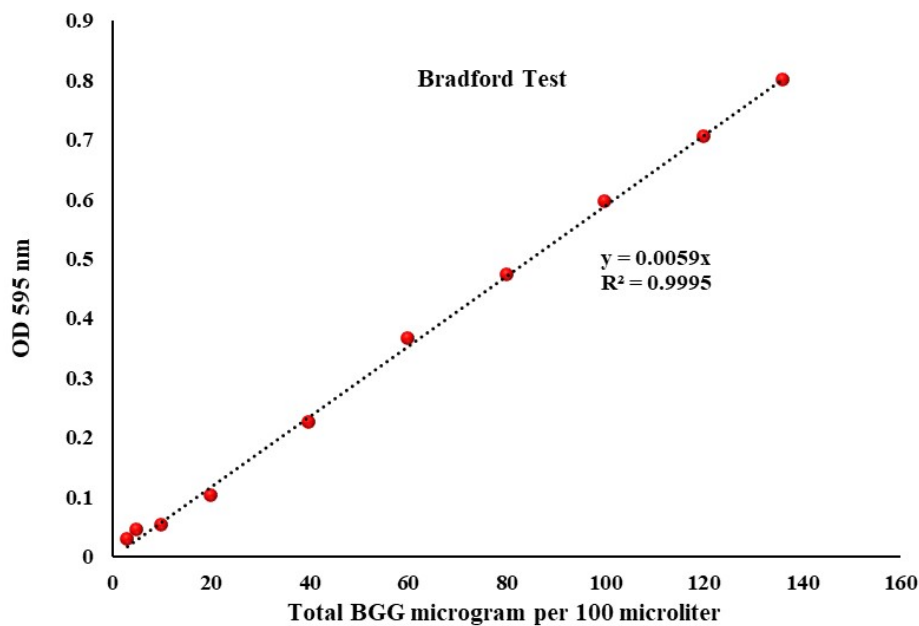

**Supplementary Fig. 4** Standard curve of net absorbance versus BGG protein sample concentration by Bradford assay.
